# Supplementary material
Source: PubMed Central journal article supplement (PMC1820713)

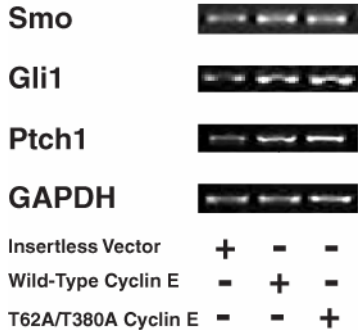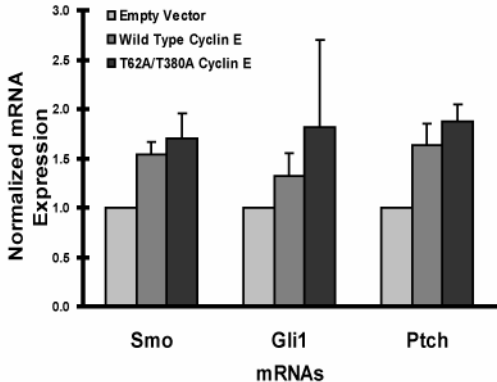

Supplement: pnas_0606537104_1.pdf [file pnas_0606537104_1.pdf]
